# Supplementary material
Source: publisher figshare collection journal article supplement (https://gsajournals.figshare.com/articles/dataset/_/7732994)
Supplement: Supplementary file 1 [file 1]

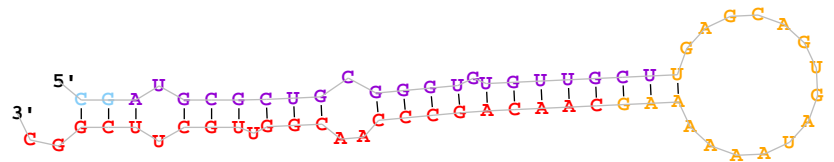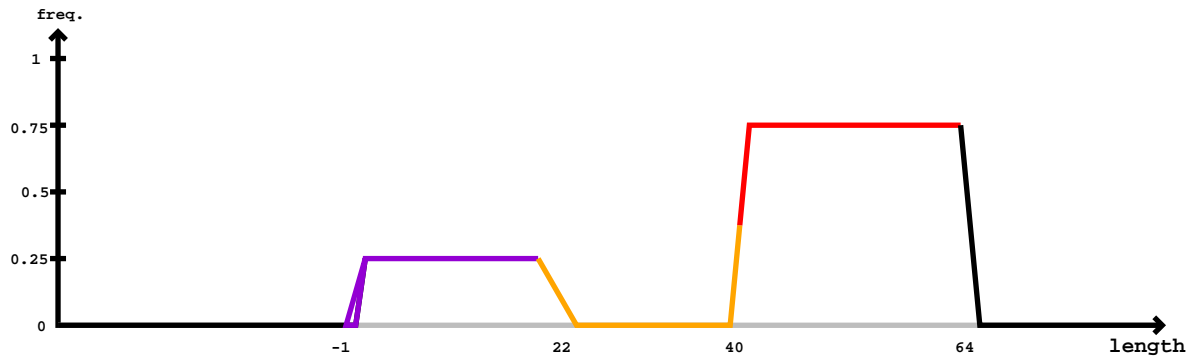

Star

**Mature**

[illegible]

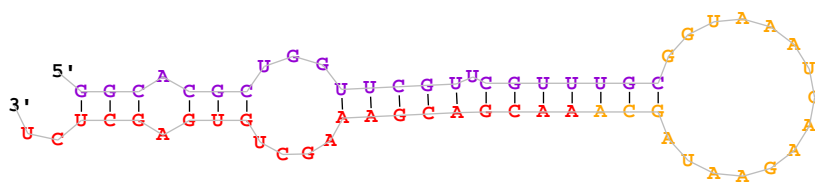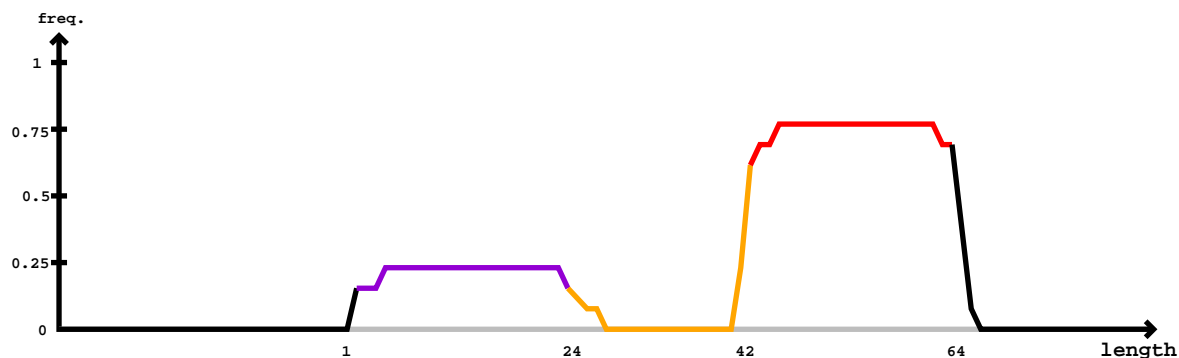

**Mature**

| 5' | gagcgacgacgaaauuacagaaauuacgauuggcacgcgucggucguucguuugcgguaaaucagaaauagcaaacgacgaaagcugugagcucuuuguggguguccuccgugggug | -3'   | obs |
|----|-----------------------------------------------------------------------------------------------------------------------|-------|-----|
|    | gagcgacgacgaaauuacagaaauuacgauuggcacgcgucggucguucguuugcgguaaaucagaaauagcaaacgacgaaagcugugagcucuuuguggguguccuccgugggug |       | exp |
|    | ..((.((((.....((.(((((((.....(((.....)))))))))).....)))).))..)))))).).....))))).                                      | reads | mm  |
|    | .....ggcacAcugguucguucguuug.....                                                                                      | 2     | 1   |
|    | .....ggcacAcugguucguucguuugc.....                                                                                     | 2     | 1   |
|    | .....acAcugguucguucguuugcggu.....                                                                                     | 2     | 1   |
|    | .....aaacgacgaaagcugugagcuc.....                                                                                      | 2     | 0   |
|    | .....aaacgacgaaagcugugagcucuc.....                                                                                    | 2     | 0   |
|    | .....aaacgacgaaagcugugagcucuu.....                                                                                    | 2     | 0   |
|    | .....aacgacgaaagcugugagcucuc.....                                                                                     | 10    | 0   |
|    | .....acgacgaaagcugugagcucuc.....                                                                                      | 2     | 0   |
|    | .....gacgaaagcugugagcucuuu.....                                                                                       | 2     | 0   |

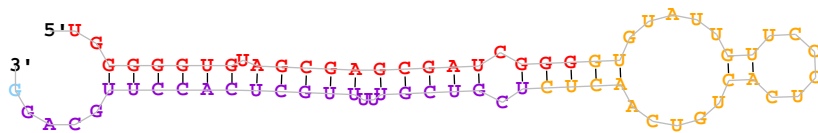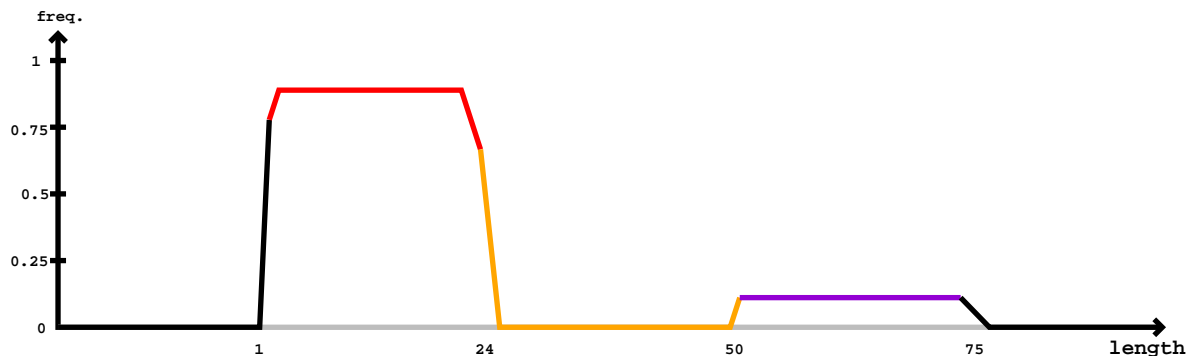

### Mature

### Star

|      |                      |                     |                                |                            |                    |       |     |
|------|----------------------|---------------------|--------------------------------|----------------------------|--------------------|-------|-----|
| 5' - | cgguuaguaccucgggaacc | uggggguguagcgagcgau | cgggguguauuguucccucacugucaacuc | ucgucguuuuugcucaccuugcaggc | caguccagcguggcccgu | -3'   | obs |
|      | cgguuaguaccucgggaacc | uggggguguagcgagcgau | cgggguguauuguucccucacugucaacuc | ucgucguuuuugcucaccuugcaggc | caguccagcguggcccgu |       | exp |
|      | (((.....)))          | (((((.....))))      | (((((.....))))                 | (((((.....))))             | (((((.....))))     | reads | mm  |
|      | .....                | .....               | .....                          | .....                      | .....              | 2     | 0   |
|      | .....                | .....               | .....                          | .....                      | .....              | 2     | 0   |
|      | .....                | .....               | .....                          | .....                      | .....              | 10    | 0   |
|      | .....                | .....               | .....                          | .....                      | .....              | 2     | 0   |
|      | .....                | .....               | .....                          | .....                      | .....              | 2     | 0   |

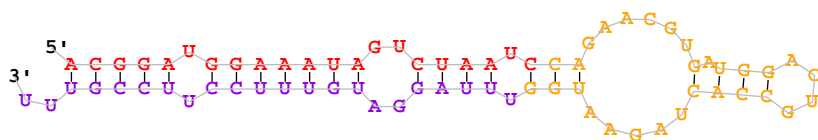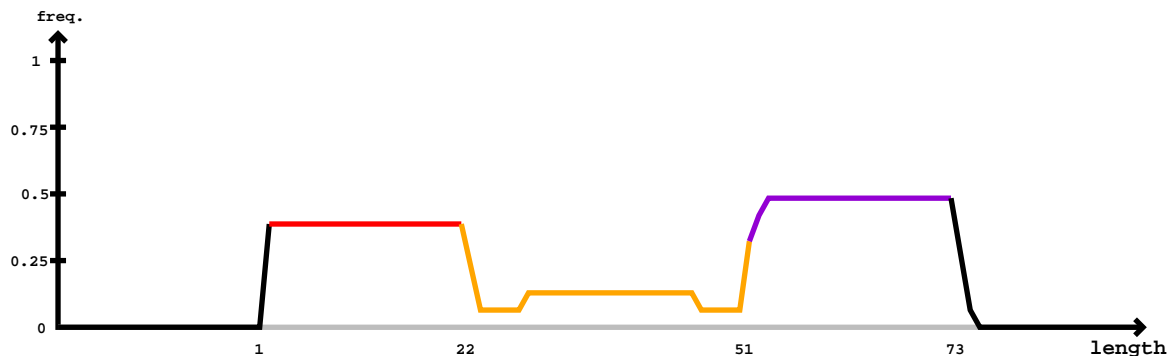

## Mature

Star

[illegible]

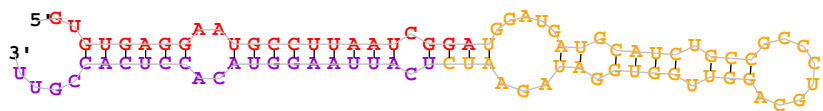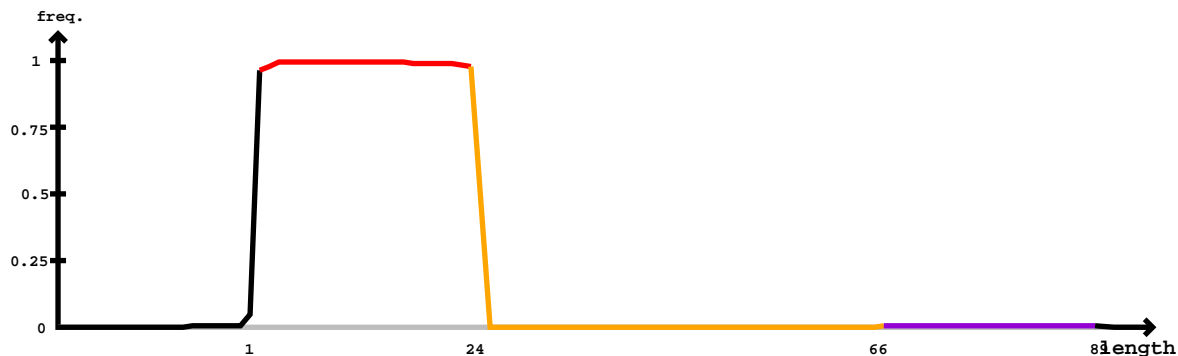

## Mature

Star

[illegible]

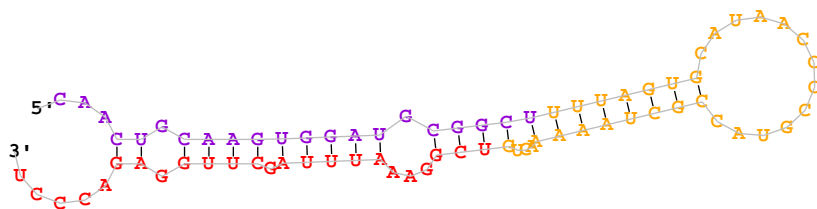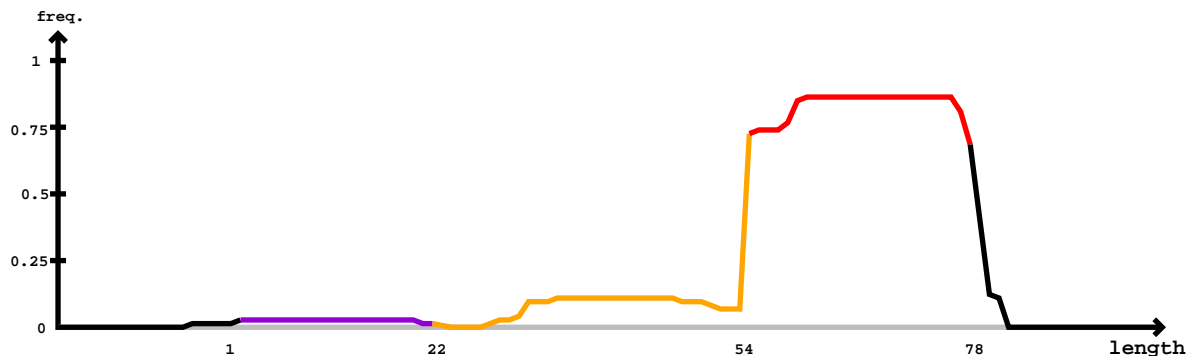

Star

## Mature

[illegible]

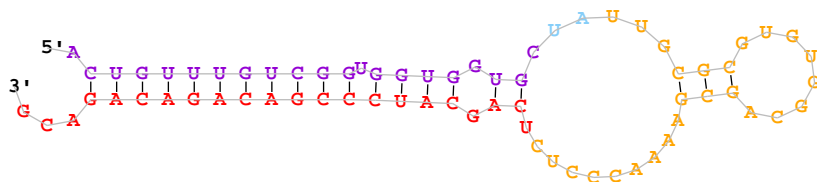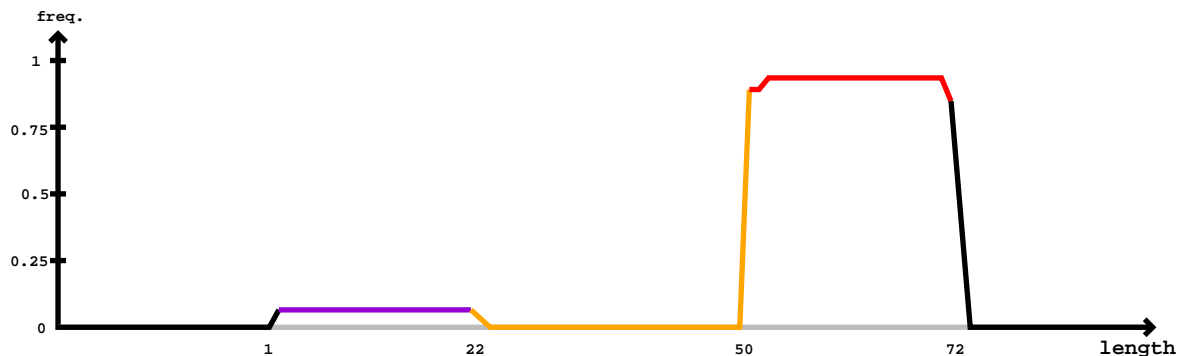

### Star

### Mature

| 5' - |                                                                                                                  | -3'   | obs |
|------|------------------------------------------------------------------------------------------------------------------|-------|-----|
|      | ggaccgcgauccguccuuucacuguuugucgggugggugcuaauugcgcguguggcagcgaaaacccucucagcaucccgacagacagacggaggaagcagaaaaccugcug |       |     |
|      | ggaccgcgauccguccuuucacuguuugucgggugggugcuaauugcgcguguggcagcgaaaacccucucagcaucccgacagacagacggaggaagcagaaaaccugcug |       | exp |
|      | ((((.....)))...((((.....((((((((((((((((((((.....((((.....)))).....))))))))))))))))).))))).((((.....))))).       | reads | mm  |
|      | .....acuguuugucgggugggugc.....                                                                                   | 3     | 0   |
|      | .....ucagcaucccgacagacagac.....                                                                                  | 4     | 0   |
|      | .....ucagcaucccgacagacagacg.....                                                                                 | 30    | 0   |
|      | .....ucagcaucccgacagacagacgg.....                                                                                | 5     | 0   |
|      | .....ucagcaucccgacagacagacgU.....                                                                                | 2     | 1   |
|      | .....agcaucccgacagacagacgg.....                                                                                  | 2     | 0   |
